# Supplementary material for: Protein and RNA ADP-ribosylation detection is influenced by sample preparation and reagents used
Source: PubMed Central journal article supplement (PMC9652768; doi:10.26508/lsa.202201455), 2022-11-11

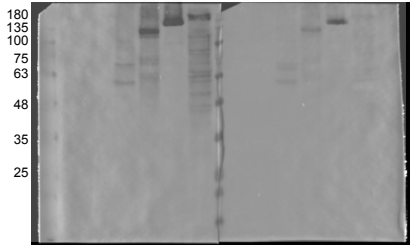

Reagent V

Reagent IV

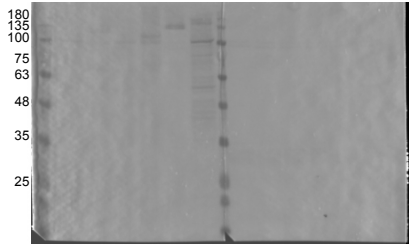

Reagent II

Reagent VI

Marker overlay

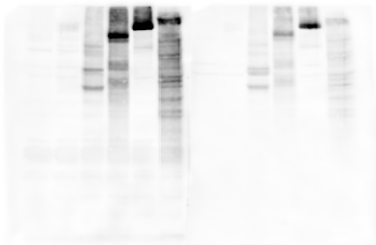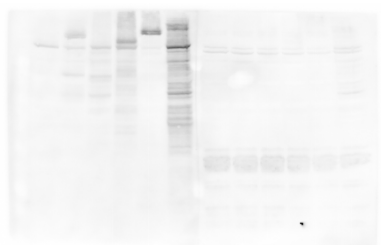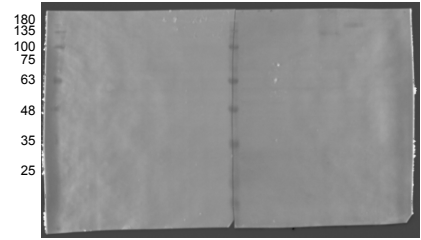

Reagent IIIm

Reagent III

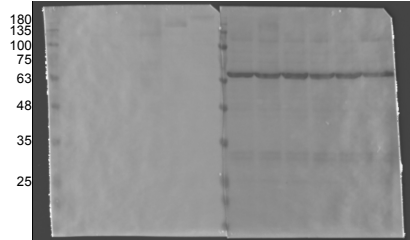

Reagent I

Reagent VII

Marker overlay

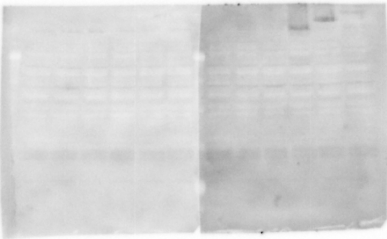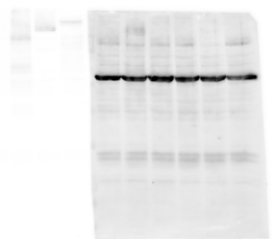

Supplement: LSA-2022-01455_SdataF4.pdf [file LSA-2022-01455_SdataF4.pdf]
